# Supplementary material for: Coupling of PARP1-mediated chromatin structural changes to transcriptional RNA polymerase II elongation and cotranscriptional splicing
Source: PubMed Central journal article supplement (PMC6378753; doi:10.1186/s13072-019-0261-1), 2019-02-18

**Coupling of PARP1-mediated chromatin structural changes to transcriptional RNA  
polymerase II elongation and cotranscriptional splicing**

Elena A. Matveeva<sup>1</sup>, Qamar M. H. Al-Tinawi<sup>1,2</sup>, Eric C. Rouchka<sup>3,4</sup>, Yvonne N. Fondufe-Mittendorf<sup>1\*</sup>

<sup>1</sup>Department of Molecular and Cellular Biochemistry, University of Kentucky, Lexington, KY 40536, USA; <sup>2</sup>Alfaisal University, Al Maather' Riyadh, 12714 Saudi Arabia; <sup>3</sup>Kentucky Biomedical Research Infrastructure Network Bioinformatics Core, 522 East Gray Street, Louisville, KY 40292, USA; <sup>4</sup>Department of Computer Engineering and Computer Science, University of Louisville, Louisville, KY 40292, USA

EAM: elmatva@uky.edu

QMHA-T: qaltinawi@alfaisal.edu

ECR: eric.rouchka@louisville.edu

YNF-M: y.fondufe-mittendorf@uky.edu

\*Corresponding author: Yvonne N. Fondufe-Mittendorf

**Western blot images of cutout gels in Additional file 1: Supplementary Figure S1 and full agarose gel image of cutout gels in Additional File 1: Supplemental Figure S2**

Full gel images of  
PARP1 and actin  
supporting  
Supplemental Figure 1

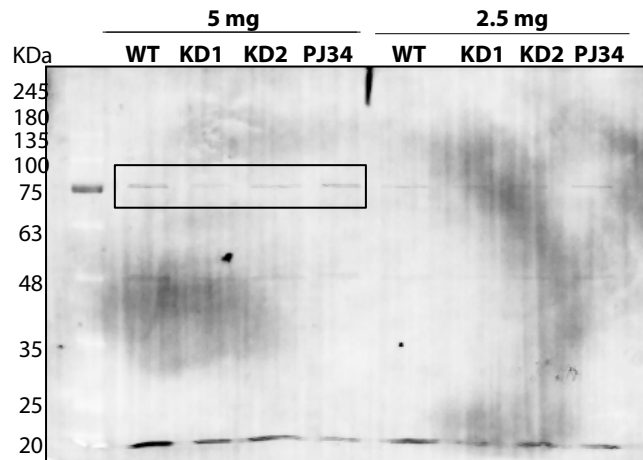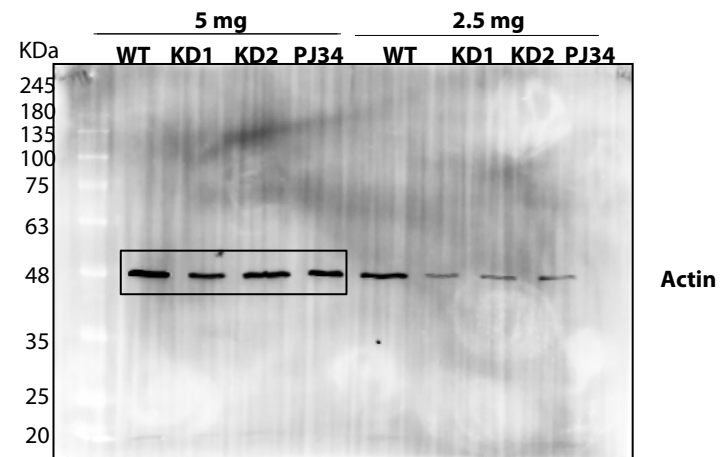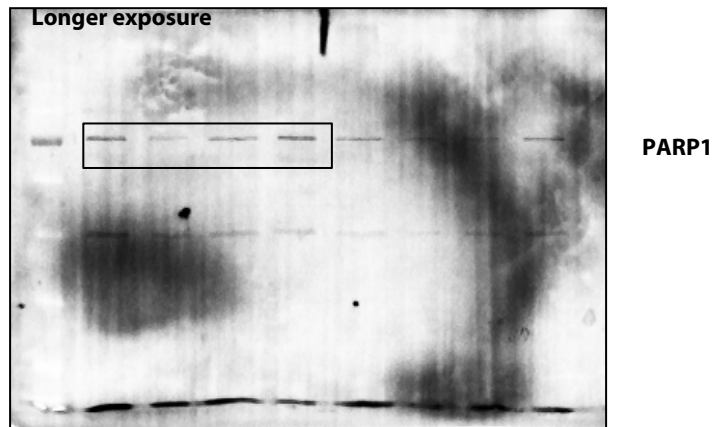

Full agarose gel image  
of splicing isoforms  
supporting  
Supplemental Figure 2

DNA markers  
PCR 1kb

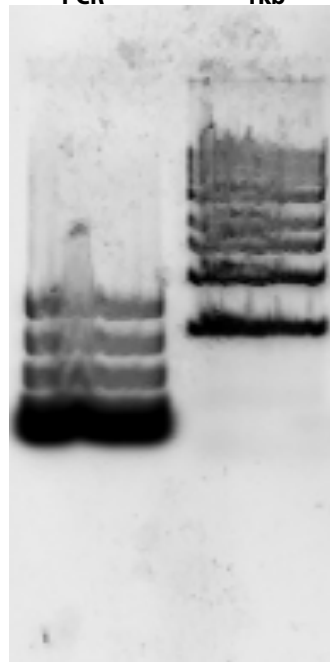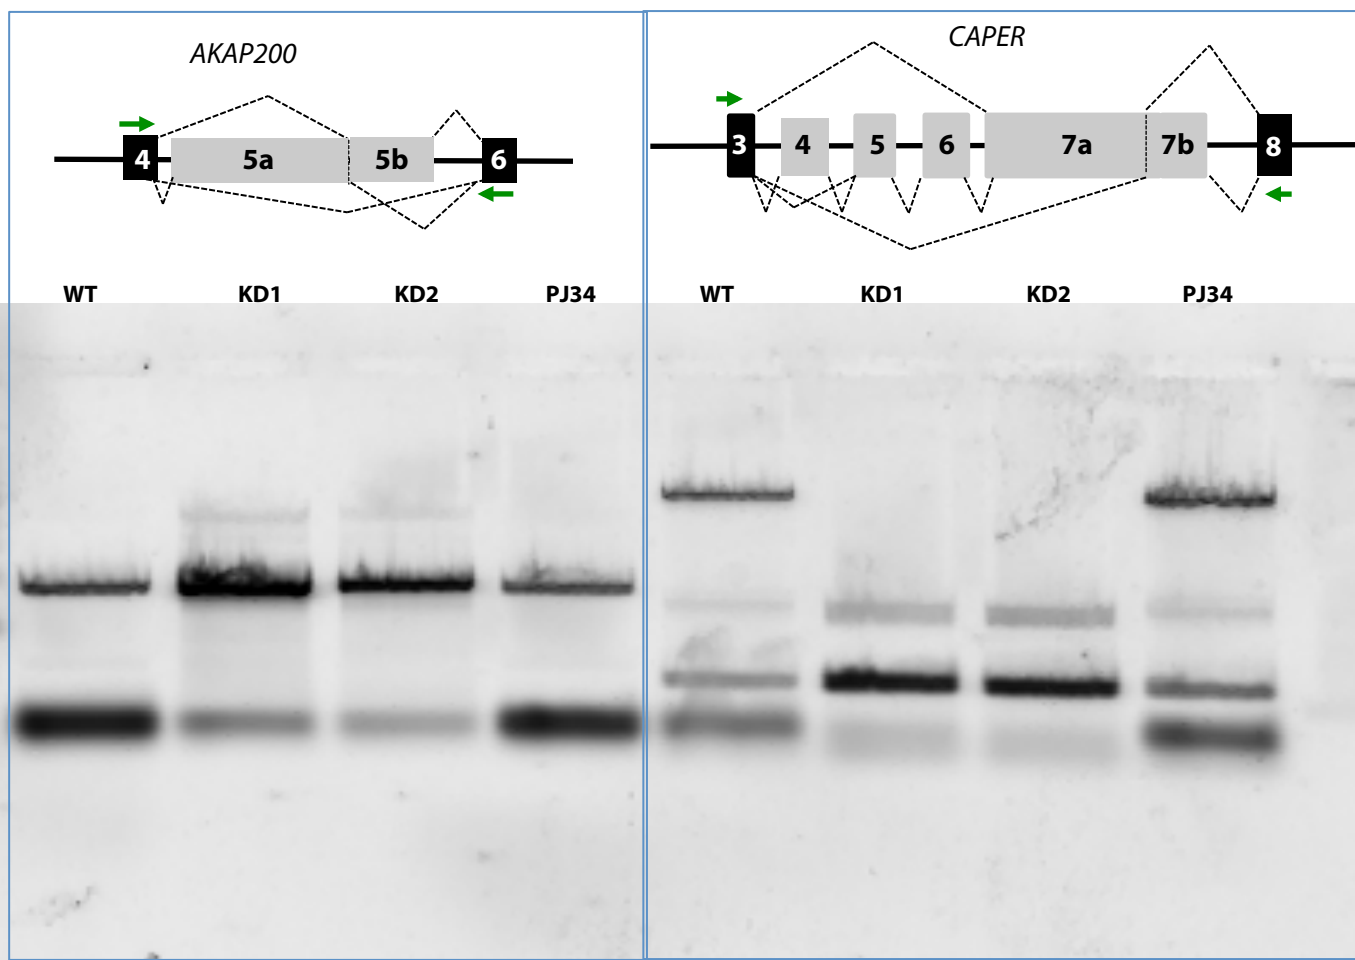

Supplement: 13072_2019_261_MOESM2_ESM.pdf [file 13072_2019_261_MOESM2_ESM.pdf]
